# Supplementary material for: Development of Polydiacetylene-Based Testosterone Detection as a Model Sensing Platform for Water-Insoluble Hormone Analytes
Source: MDPI journal article supplement (doi:10.3390/chemosensors9070176), 2021-07-12
Supplement: s1 [file s1]

Supplementary

# Development of Polydiacetylene-Based Testosterone Detection as a Model Sensing Platform for Water-Insoluble Hormone Analytes

Jaewon Jung <sup>1</sup>, Sungmin An <sup>1</sup>, Eunkyung Lim <sup>2,3</sup>, Seungchul Kim <sup>4</sup>, Beumsoo An <sup>1</sup> and Sungbaek Seo <sup>1,\*</sup>

<sup>1</sup> Department of Biomaterials Science (BK21 FOUR Program), College of Natural Resources and Life Science/Life and Industry Convergence Research Institute, Pusan National University, Miryang 50463, Korea; jenifer5192@pusan.ac.kr (J.J.); ied234@naver.com (S.A.); anbs@pusan.ac.kr (B.A.)

<sup>2</sup> BioNanotechnology Research Center, KRIBB, 125 Gwahak-ro, Yuseong-gu, Daejeon 34141, Korea; eklim1112@kribb.re.kr

<sup>3</sup> Department of Nanobiotechnology, KRIBB School of Biotechnology, UST, 217 Gajeong-ro, Yuseong-gu, Daejeon 34113, Korea

<sup>4</sup> Department of Obstetrics and Gynecology, Pusan National University College of Medicine, Yangsan, Gyeongnam 50612, Korea; ksch0127@naver.com

\* Correspondence: sbseo81@pusan.ac.kr

**Citation:** Jung, J.; An, S.-M.; Lim, E.-K.; Kim, S.-C.; An, B.-S.; Seo, S. Development of Polydiacetylene-Based Testosterone Detection As a Model Sensing Platform for Water-Insoluble Hormone Analytes. *Chemosensors* **2021**, *9*, 176. <https://doi.org/10.3390/chemosensors9070176>

Academic Editor: Pietro Salvo

Received: 24 May 2021

Accepted: 8 July 2021

Published: 12 July 2021

**Publisher's Note:** MDPI stays neutral with regard to jurisdictional claims in published maps and institutional affiliations.

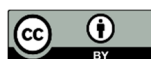

**Copyright:** © 2021 by the authors. Licensee MDPI, Basel, Switzerland. This article is an open access article distributed under the terms and conditions of the Creative Commons Attribution (CC BY) license (<http://creativecommons.org/licenses/by/4.0/>).

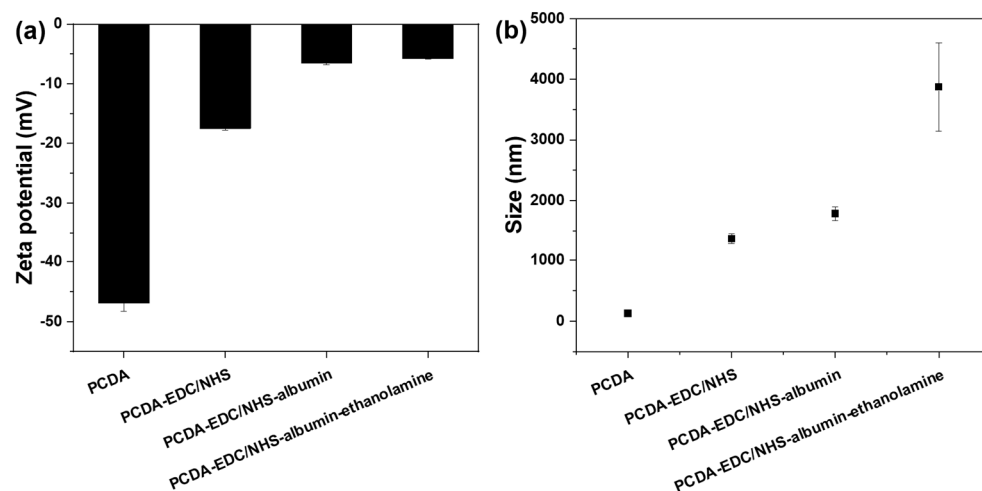

Figure S1. (a) Zeta potential values and (b) size of PDA and during conjugating albumin to PDA.

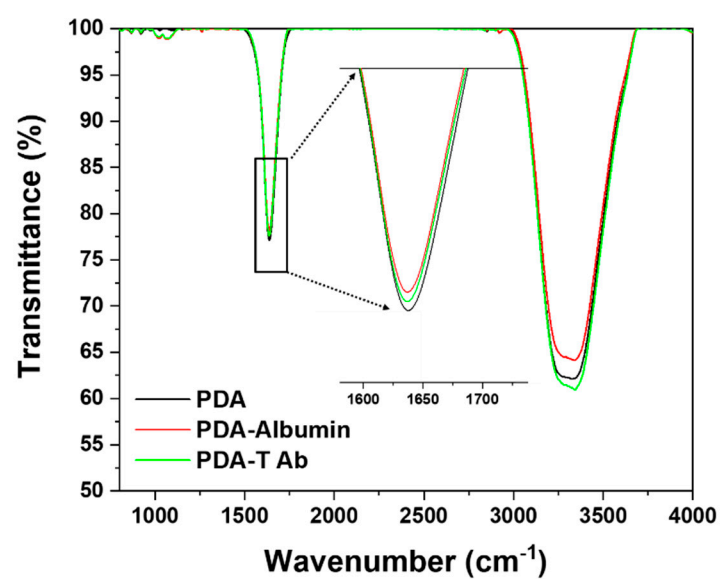

Figure S2. FT-IR spectra of PDA, PDA-Albumin and PDA-T Ab.

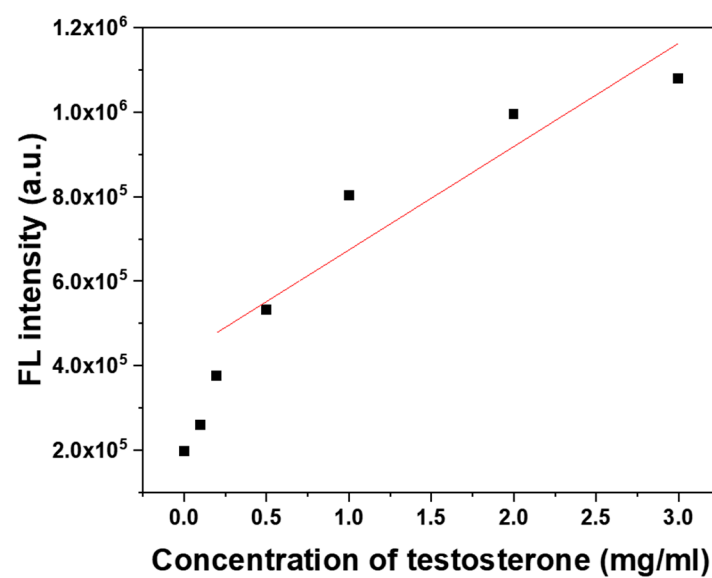

Figure S3. Fluorescence intensity of PDA-T Ab after incubation with testosterone hormones in filtered human serum.
